# Supplementary material
Source: publisher site journal article supplement (https://biss.pensoft.net/article/download/suppl/5188697/)
Supplement: Supplementary file 1

**Supporting material**

The first image depicts the whole model, the second the same model but retaining only highly connected nodes and their edges. The other images are snapshots obtained by interactively highlighting different elements to focus on their connections within the system. These provide examples of the ways in which participants will be able to navigate through the model and explore it in depth. Please note that these are screenshots, and constrained by the high number of connections: in real-time navigation the resolution will be high quality.

Blue edges between nodes indicate positive impacts, and red edges indicate negative impacts. Arrow directions indicate the source of these impacts, i.e. a parent node directs an edge towards a child node, with associated positive or negative impacts from the parent to the child node.

**Figure 1: Complete model of the system, displaying the differing effects received by the UN SDGs, and caused by EU-supported renewable energy policies and technologies. Policies are blue nodes, technologies red, biodiversity and environmental impacts green, social impacts magenta, and the SDGS are orange.**

**Figure 2: Complete model of the system, but retaining only highly connected nodes (degree 12 and above), illustrating generally positive impacts on Sustainable Development Goal 7: Affordable and Clean Energy.**

**.**

**
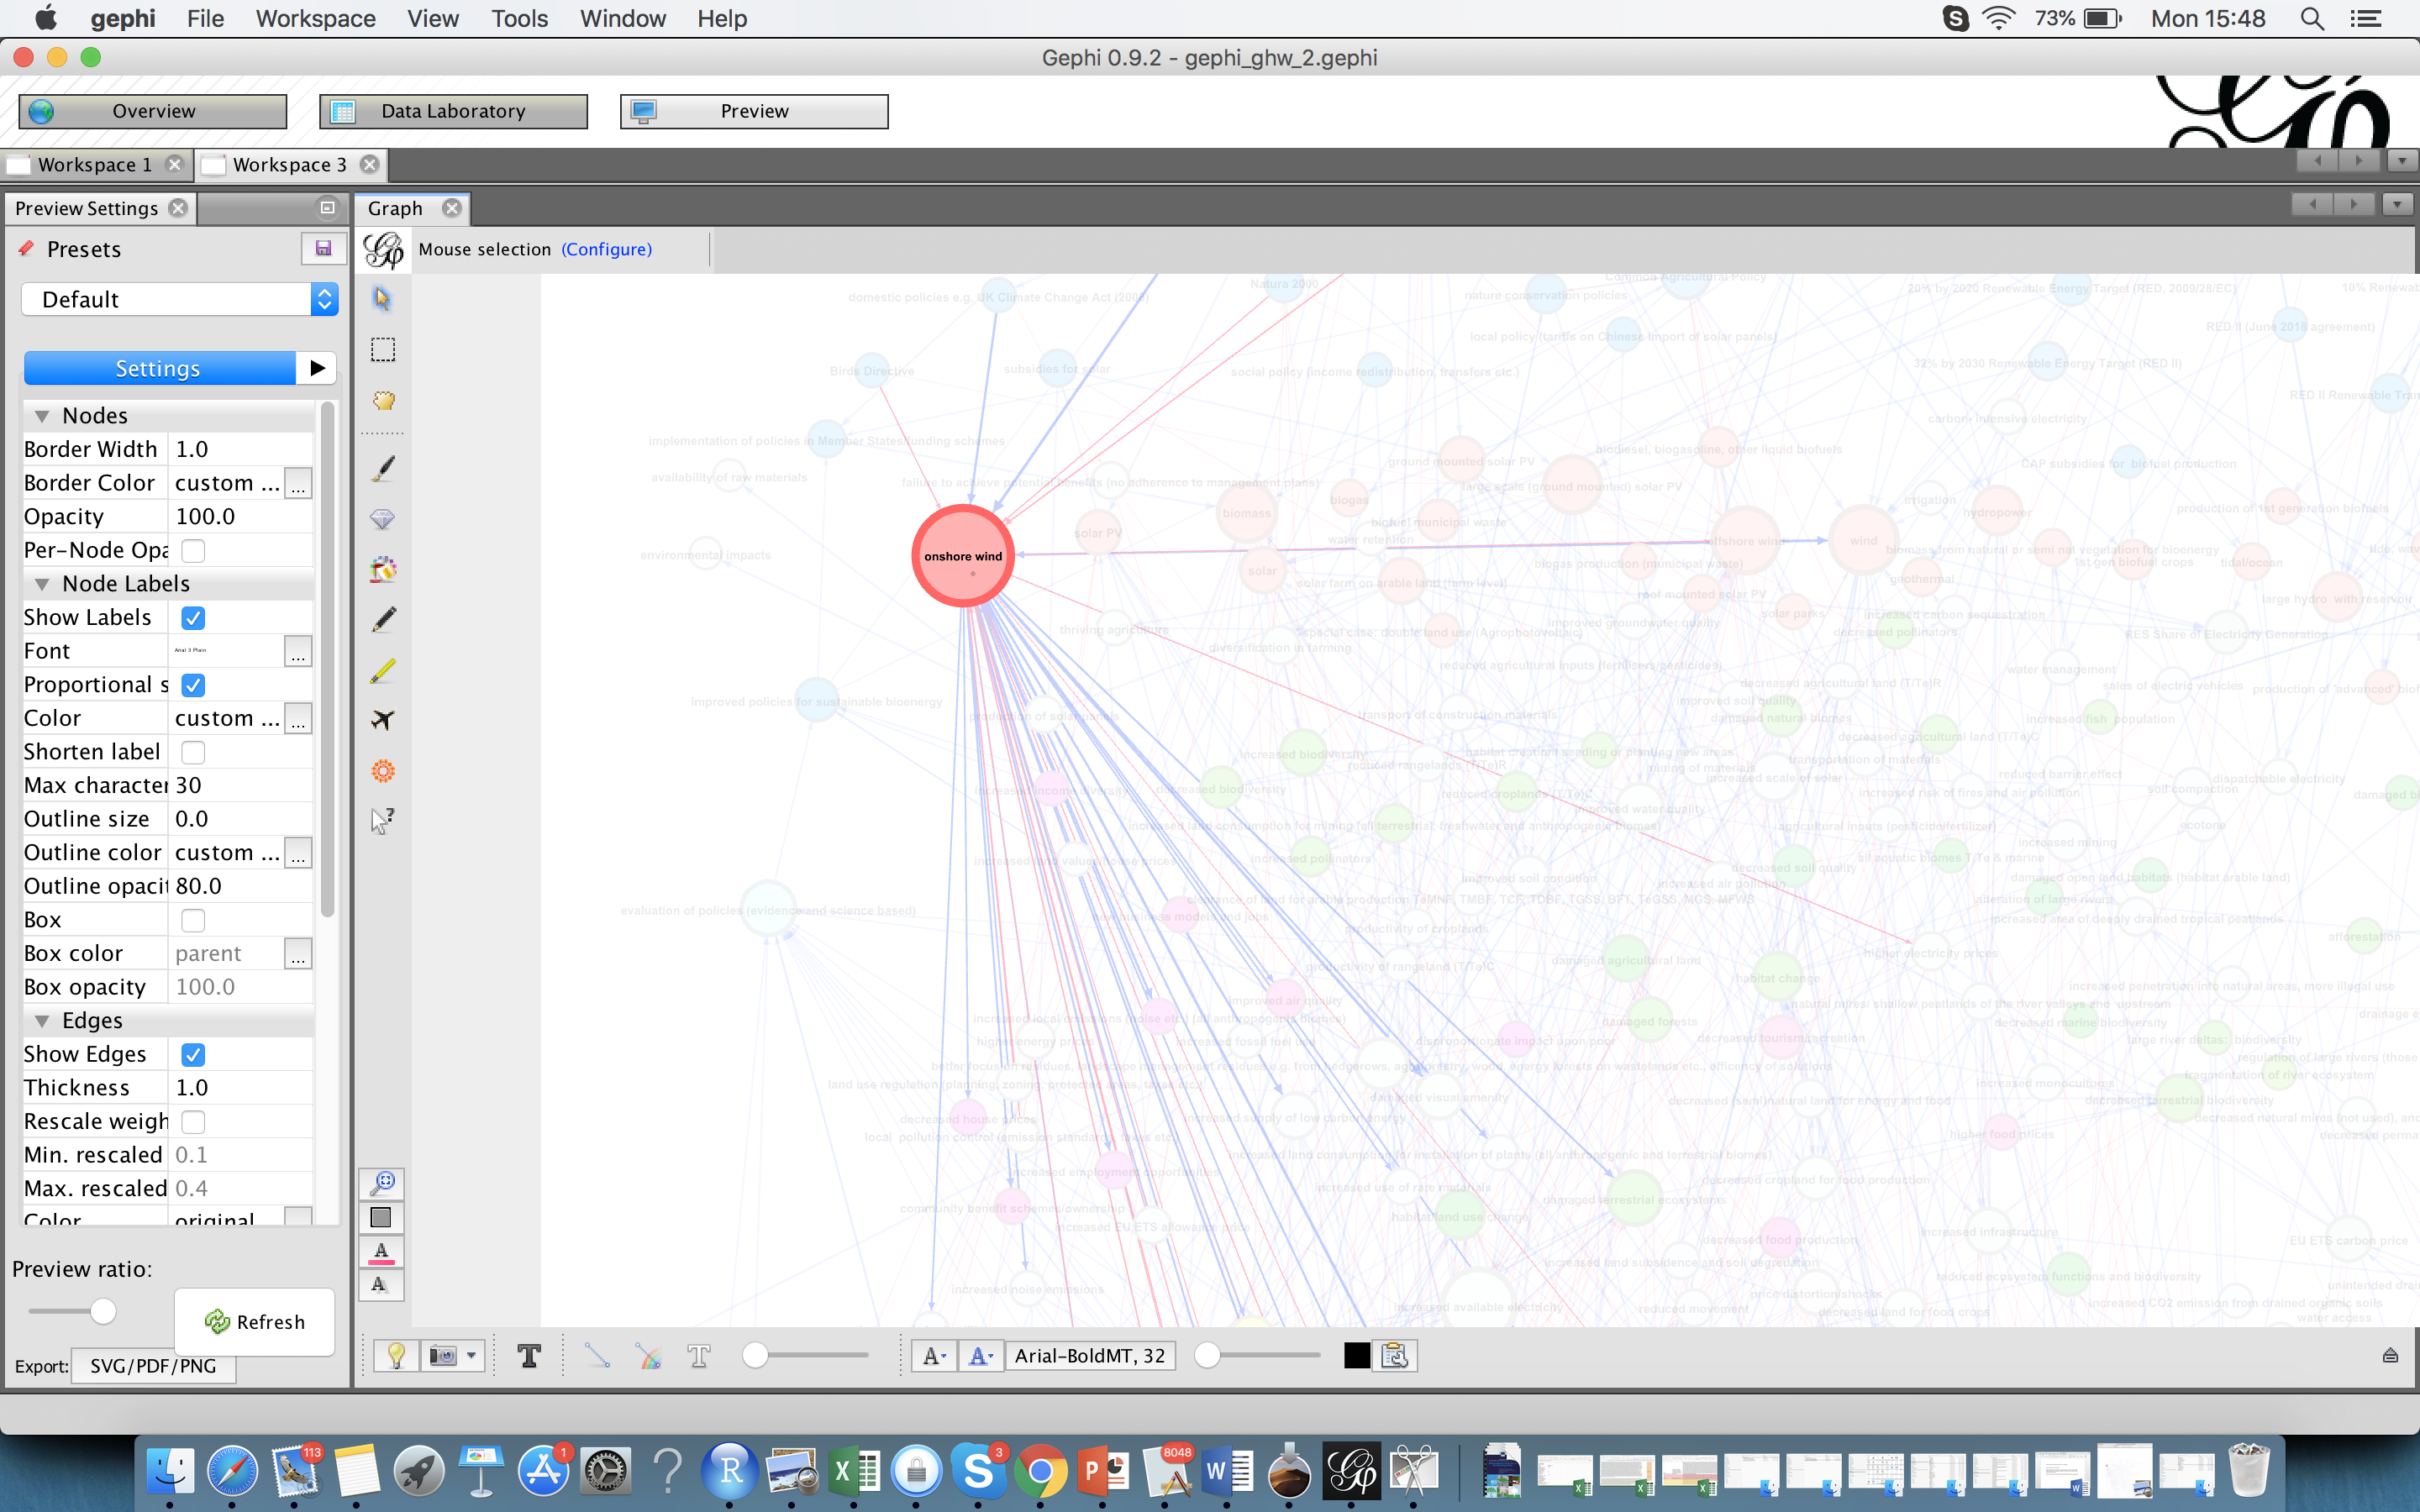
**
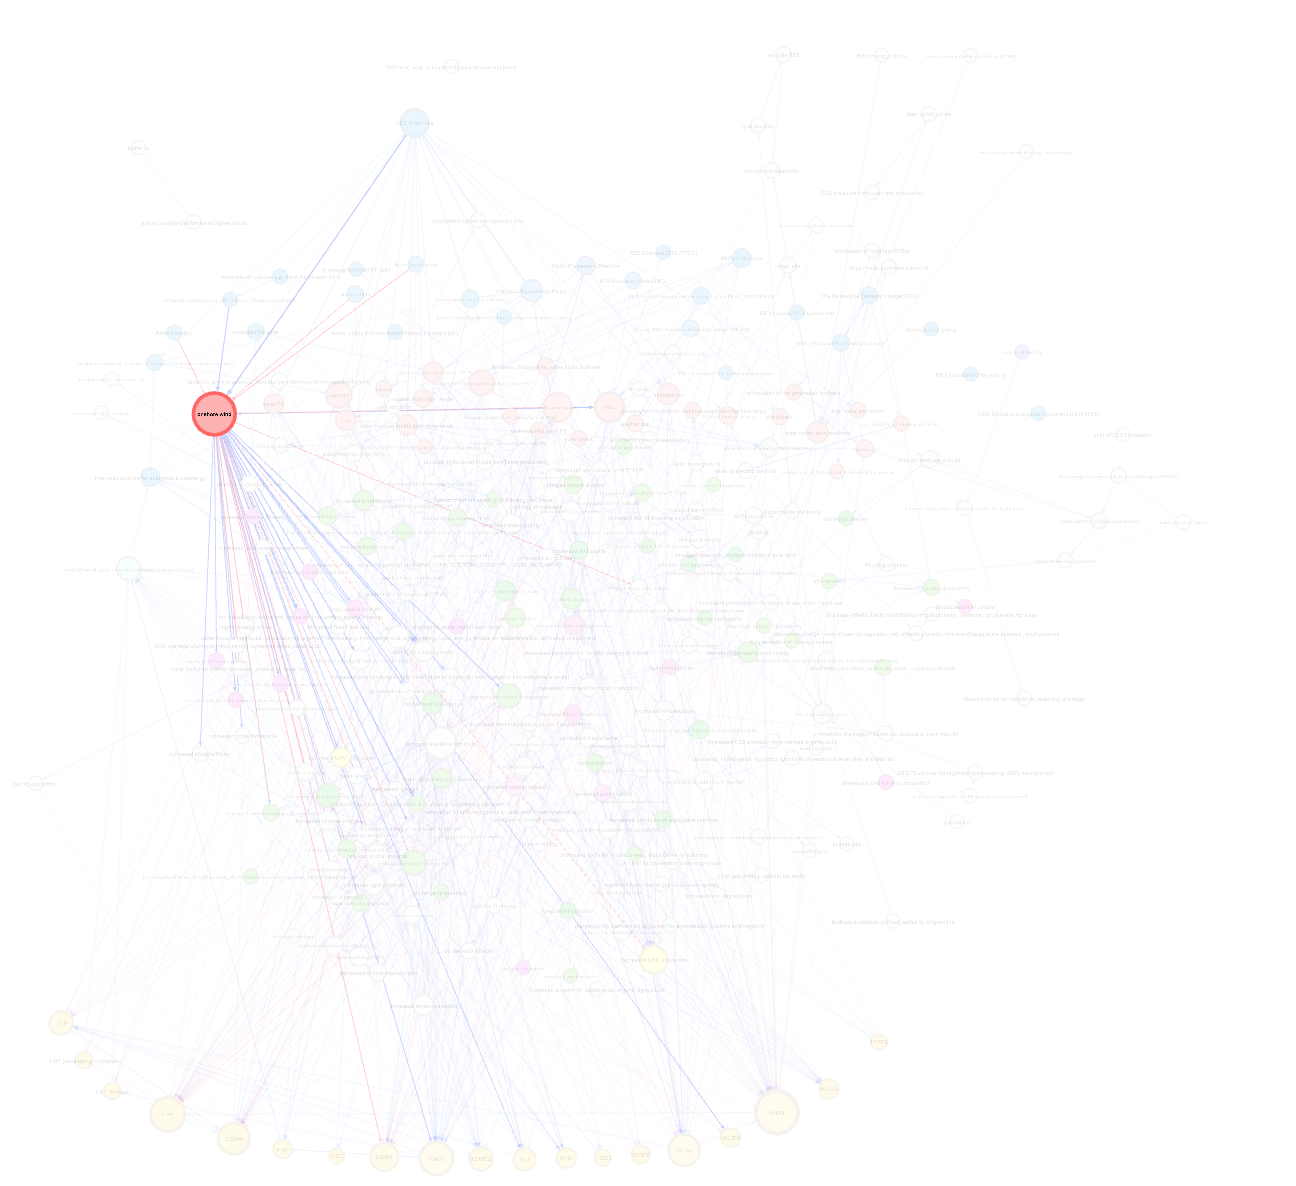


**Figure 3: Onshore wind highlighted to show its connections to other nodes in the system.**


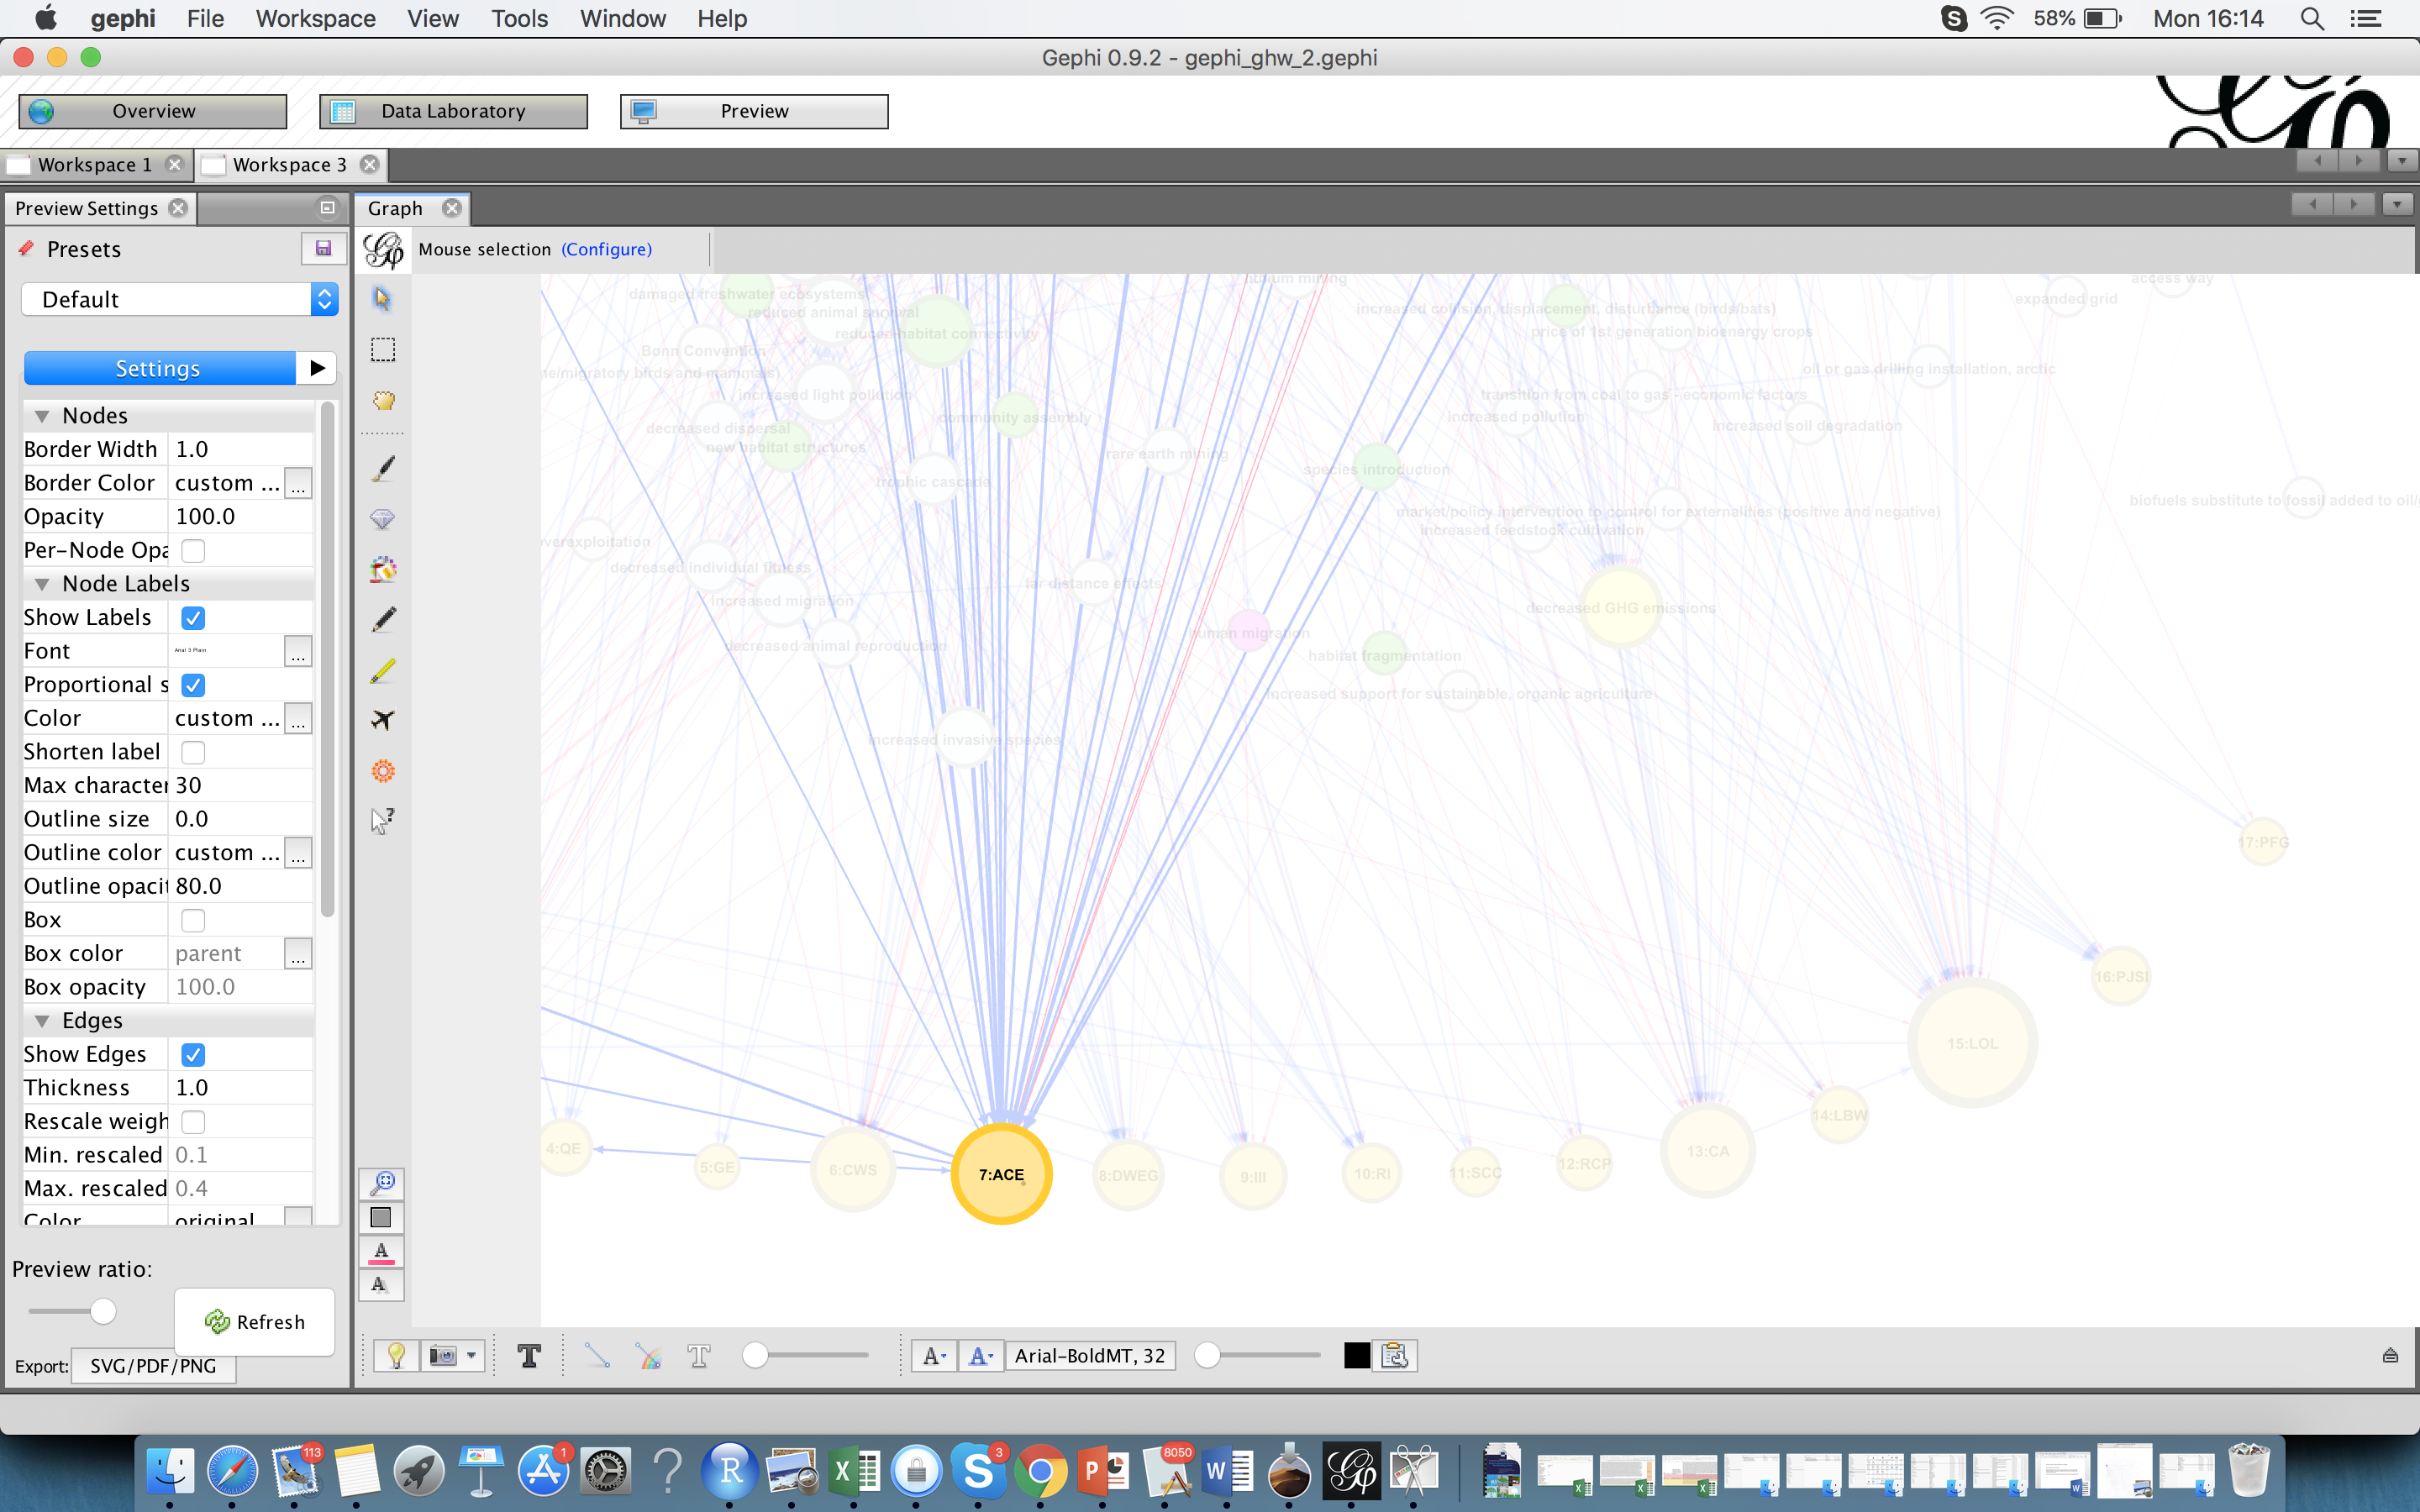

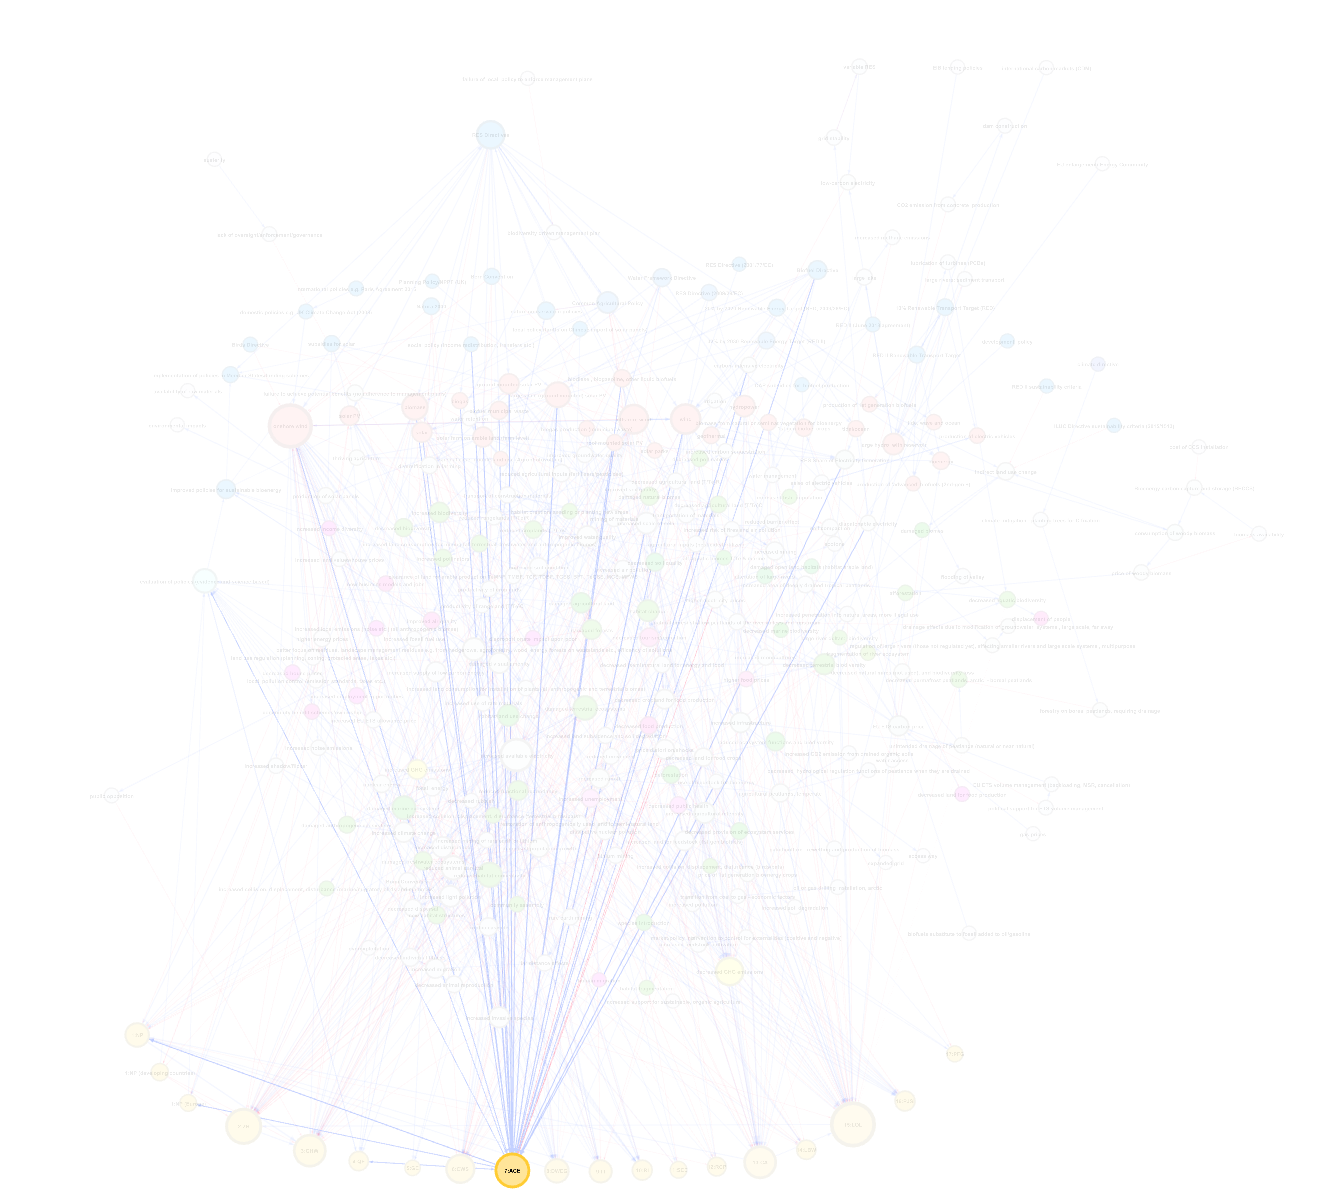


**Figure 4: Sustainable Development Goal 7: Affordable and Clean Energy, highlighted to show its connections to other nodes in the system. Blue edges between nodes indicate positive impacts from offshore wind, and red edges indicate negative impacts.**


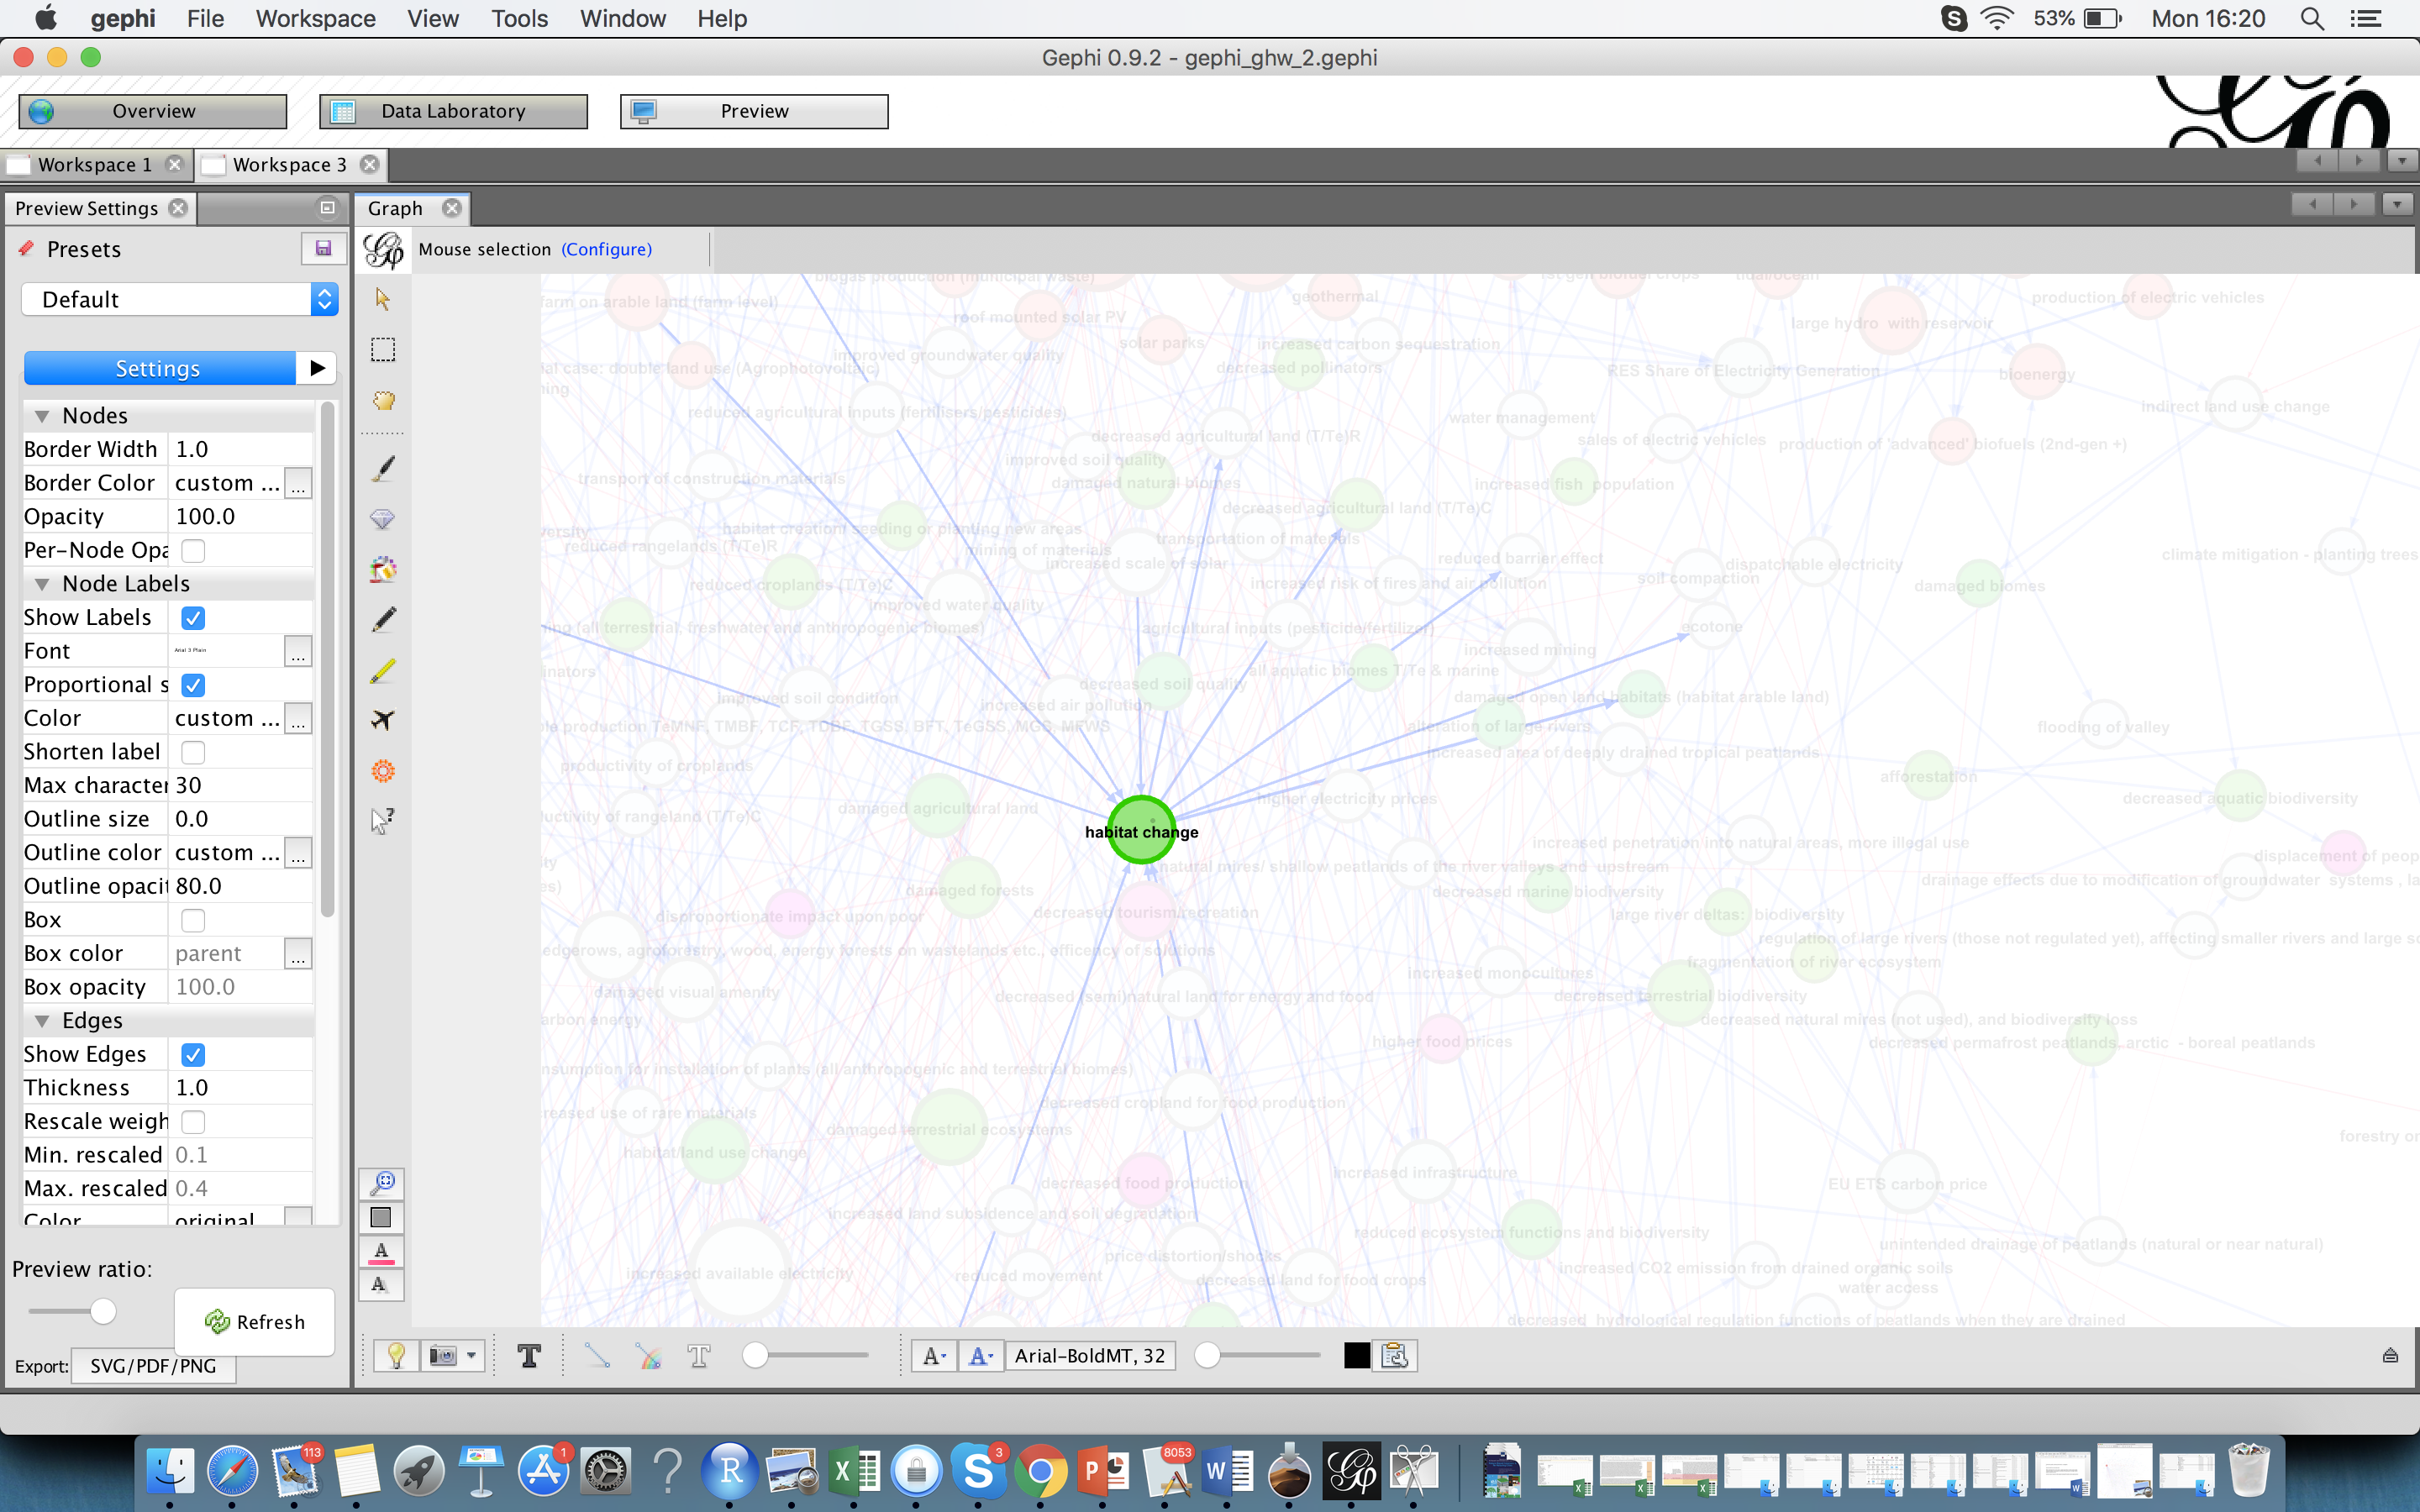

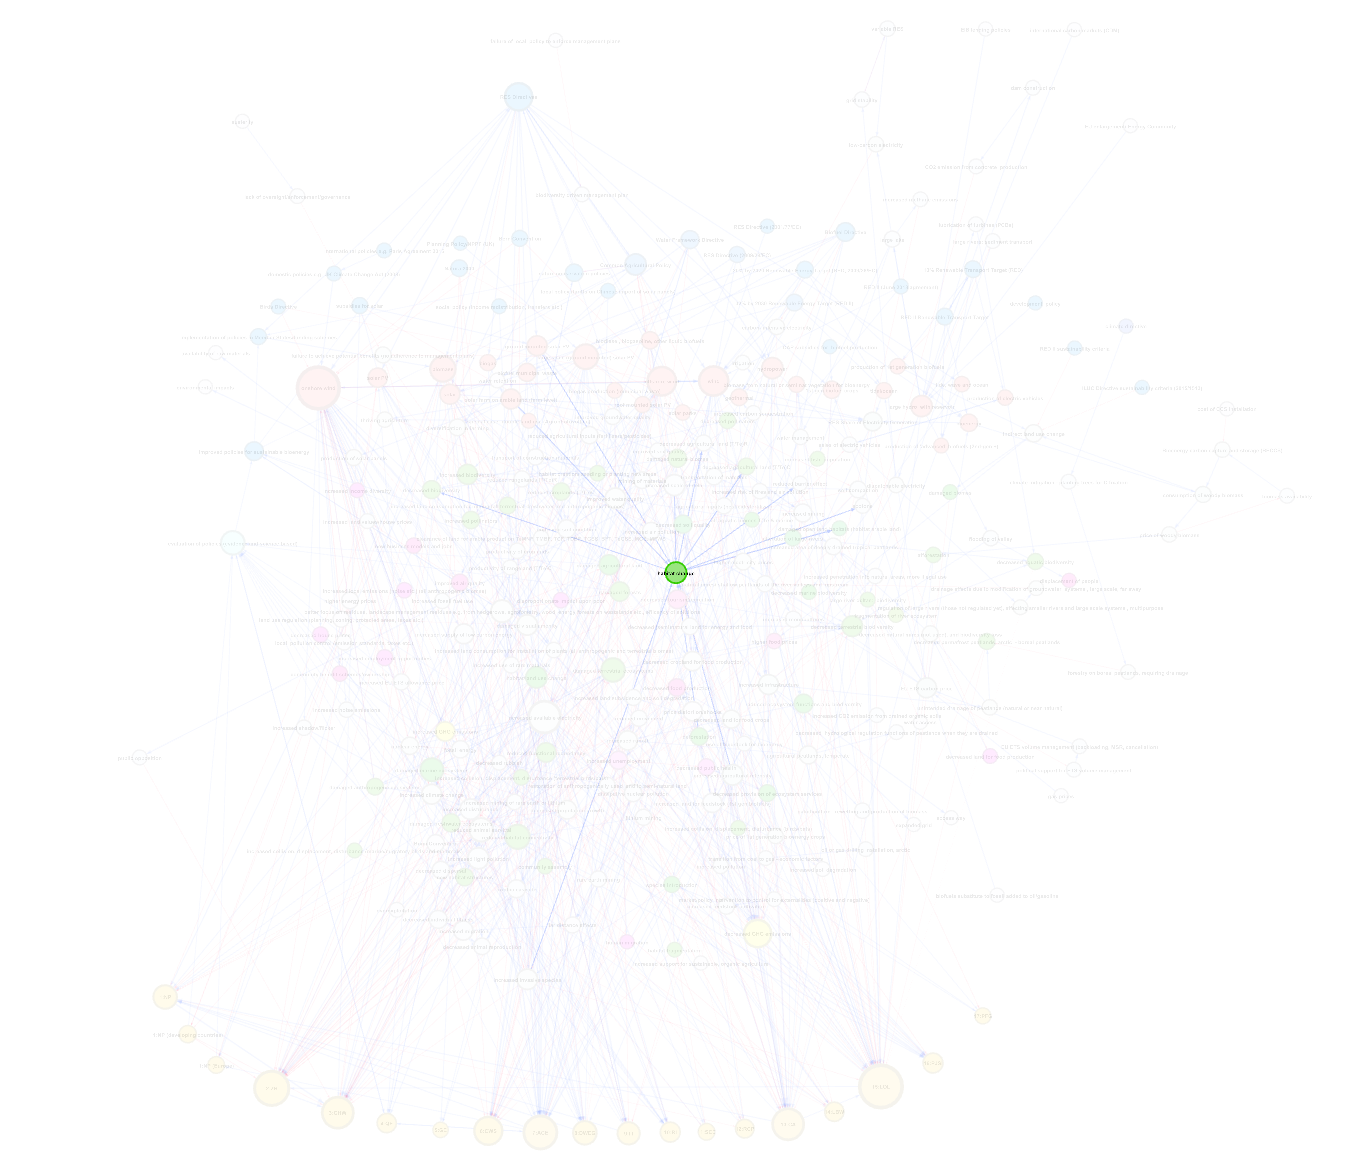


**Figure 5: Habitat change, highlighted to show its connections to other nodes in the system. Blue edges between nodes indicate positive impacts from offshore wind, and red edges indicate negative impacts.**
